# Supplementary material for: The epidemiology of silent brain infarction: a systematic review of population-based cohorts
Source: Springer Nature journal article supplement (doi:10.1186/s12916-014-0119-0), 2014-07-09

## PRISMA Flow Diagram

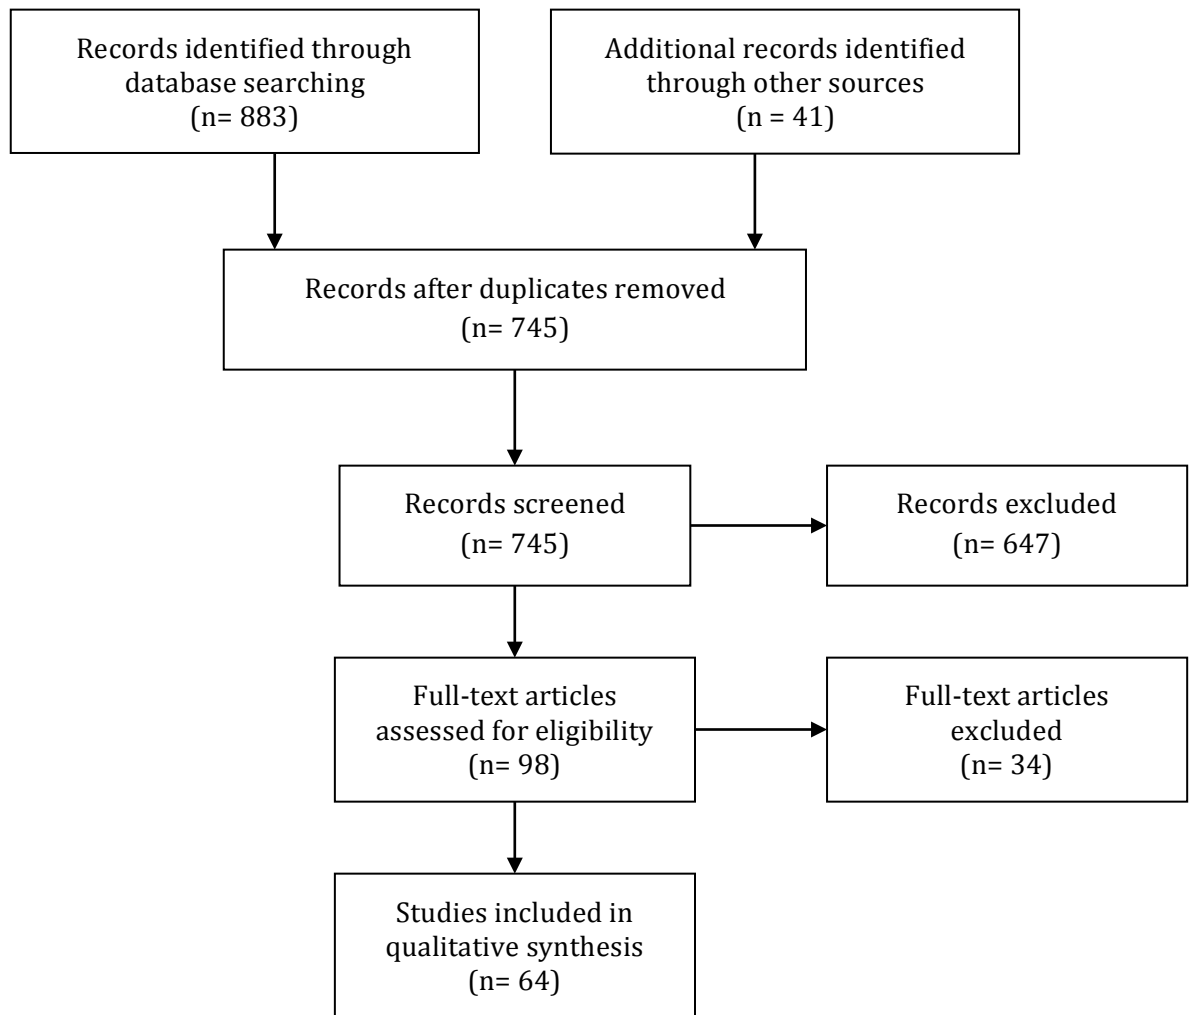

Supplement: MOESM2 [file 9758396]
