# Supplementary material for: The epidemiology of silent brain infarction: a systematic review of population-based cohorts
Source: Springer Nature journal article supplement (doi:10.1186/s12916-014-0119-0), 2014-07-09
Supplement: MOESM12 [file 9758396]

**Table 1:** Prevalence and incidence of Silent Brain Infarcts in General Populations, by Mean Sample Age

| **Study Name or center** | **Authors** | **Year** | **Country** | **Study Design** | **Sample Size** | **Mean Age** | **Mean Prevalence** |
| --- | --- | --- | --- | --- | --- | --- | --- |
| **PREVALENCE** | | | | | | | |
| Seiryo Clinic Study | Asumi[15](#_ENREF_15" \o "Asumi, 2010 #527) | 2010 | Japan | RHS | 324 | 54 | 5.2% |
| Shimane | Bokura[10](#_ENREF_10" \o "Bokura, 2006 #512) | 2006 | Japan | RHS | 2684 | 58 | 14% |
| Bokura[16](#_ENREF_16" \o "Bokura, 2010 #444) | 2010 | Japan | RHS | 1543 | 62 | 14% |
| SNUH Gangnam MRI Survey | Kwon[17](#_ENREF_17) | 2006 | Korea | RHS | 1588 | 54 | 5.5% |
| Kwon[18](#_ENREF_18) | 2009 | Korea | RHS | 1254 | 70 | 15.7% |
| Samsung Medical Centre | Lee[19](#_ENREF_19) | 2000 | Korea | RHS | 994 | 49 | 5.8% |
| “Brain Dock” program | Matsumoto[20](#_ENREF_20) | 2007 | Japan | RHS | 476 | 52 | 20.8% |
| Japanese Elderly | Nakagawa[21](#_ENREF_21) | 2000 | Japan | RHS | 269 | 79 | 62% |
| Kawasaki medical school | Saji[22](#_ENREF_22" \o "Saji, 2012 #428) | 2012 | Japan | RHS | 220 | 69 | 25% |
| Saji[23](#_ENREF_23" \o "Saji, 2012 #518) | 2012 | Japan | RHS | 240 | 69 | 17.5% |
| Hyogo Brain & Heart Centre | Uehara[24](#_ENREF_24" \o "Uehara, 1999 #346) | 1999 | Japan | RHS | 219 | 63 | 40.2% |
| Second Military Medical University | Yi[25](#_ENREF_25) | 2011 | China | RHS | 1008 | 49 | 32.5% |
| Chiba University | Yoshida[26](#_ENREF_26) | 2010 | Japan | RHS | 790 | 61 | 27.1% |
| KoGES | Cho[27](#_ENREF_27) | 2013 | Korea | CS | 746 | 59 | 7.6% |
| Kochi University | Park[28](#_ENREF_28) | 2008 | Japan | CS | 2076 | 51 | 5.7% |
| Memorial Hospital Taipei | Chou[29](#_ENREF_29) | 2011 | Taiwan | CS&RHS | 1312 | 52 | 5% |
| NILS-LSA | Kohara[30](#_ENREF_30" \o "Kohara, 2003 #522) | 2003 | Japan | CS | 1721 | 59 | 10.3% |
| FHOS | Das[31](#_ENREF_31) | 2008 | USA | CS | 2040 | 62 | 11% |
| FHS | DeCarli[32](#_ENREF_32" \o "DeCarli, 2005 #521) | 2005 | USA | CS | 2081 | 62 | 12% |
| ARICS | Howard[33](#_ENREF_33) | 1998 | USA | CS | 1737 | 63 | 11% |
| ASPS | Schmidt R[34](#_ENREF_34) | 2006 | Austria | CS | 505 | 70 | 8% |
| Ohasama | Aono[35](#_ENREF_35" \o "Aono, 2007 #520) | 2007 | Japan | CS | 958 | 66 | 49% |
| NOMAS | Willey[36](#_ENREF_36) | 2011 | USA | CS | 1238 | 70 | 16% |
| MEMO | Schmidt WP[37](#_ENREF_37) | 2004 | Germany | CS | 267 | 72 | 12.7% |
| Rotterdam Scan | Vermeer[38](#_ENREF_38) | 2002 | Netherlands | CS | 1077 | 72 | 20% |
| CHS | Price[3](#_ENREF_3) | 1997 | USA | CS | 3397 | 75 | 28% |
| Sefuri Brain MRI | Fukuda[39](#_ENREF_39) | 2013 | Japan | CS | 715 | 67 | 12.4% |
| 3C-Dijon | Satizabal[40](#_ENREF_40" \o "Satizabal, 2012 #539) | 2012 | France | CS | 1841 | 72.5 | 8.9% |
| TASCOG | Choi[41](#_ENREF_41) | 2012 | Australia | CS | 351 | 72 | 12.2% |
| CABL | Russo[42](#_ENREF_42) | 2013 | USA | CS | 455 | 70 | 15.4% |
| **Study Name or center** | **Authors** | **Year** | **Country** | **Study Design** | **Sample Size** | **Mean Age** | **Mean Incidence** |
| **INCIDENCE** | | | | | | | |
| ARICS | Cheung[43](#_ENREF_43) | 2010 | USA | CS | 810 | 62 | 1.9% |
| CHS | Longstreth[14](#_ENREF_14" \o "Longstreth, 2002 #514) | 2002 | USA | CS | 1433 | 74 | 3.1% |
| Rotterdam Scan Study | Vermeer[44](#_ENREF_44) | 2003 | Netherlands | CS | 668 | 71 | 3.7% |

* study reported silent lacunar (subcortical) infarcts only. RHS = routine health screen; CS = community sample; SNUH = Seoul National University Hospital; KoGES = Korean Genome and epidemiology study; NILS-LSA = National Institute for Longevity Sciences-Longtitudinal Study of Aging; FHOS = Framingham Heart Offspring Study ; FHS = Framingham Heart Study; ARICS = Atherosclerosis Risk in Communities Study; ASPS = Austrian Stroke Prevention Study; NOMAS = Northern Manhattan Study; MEMO = Memory and Morbidity in Augsberg Elderly; CHS = Cardiovascular Health Study; TASCOG = Tasmanian Study of Cognition and Gait; CABL = Cardiovascular Abnormalities and Brain Lesions.
